# Supplementary material
Source: publisher figshare collection journal article supplement (https://acs.figshare.com/ndownloader/files/3870502)
Supplement: Supplementary file 1 [file 3870502]

## Supporting Informations

### **Axial Thiophenolate Coordination on Diiron(III)bisporphyrin: Influence of Heme-Heme Interactions on Structure, Function and Electrochemical Properties of the Individual Heme Center**

Debangsu Sil, Firoz Shah Tuglak Khan and Sankar Prasad Rath\*

*Department of Chemistry, Indian Institute of Technology Kanpur, Kanpur-208016, INDIA. Email: [sprath@iitk.ac.in](mailto:sprath@iitk.ac.in)*

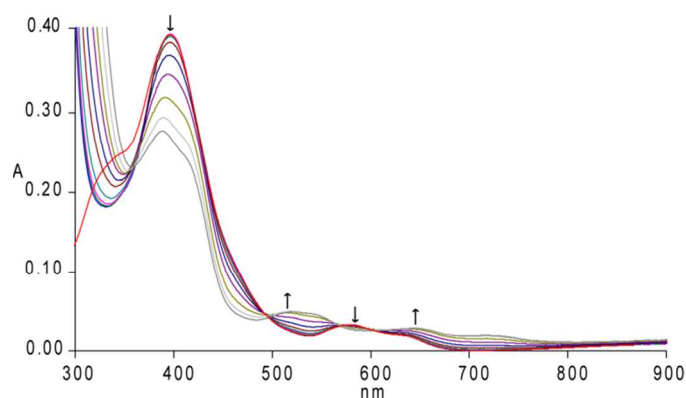

**Figure S1.** Time resolved UV-vis spectral changes upon gradual addition of thiophenol to a solution of **1** ( $\sim 10^{-6}$  M) in DCM at 298K, as the host:guest ratio changes from 1:0 to 1:5. Arrows indicate an increase or decrease of band intensity.

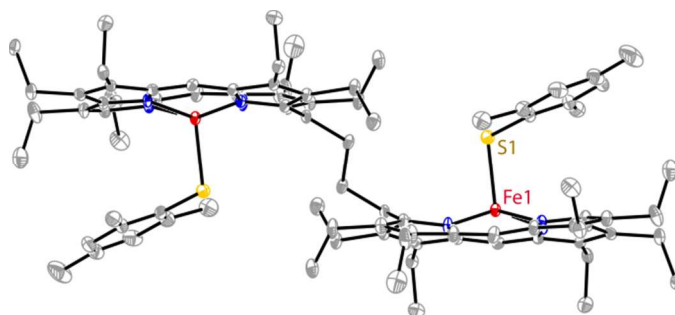

**Figure S2.** A perspective view of **2b** showing 50% thermal contours for all non-hydrogen atoms at 100 K (H atoms have been omitted for clarity).

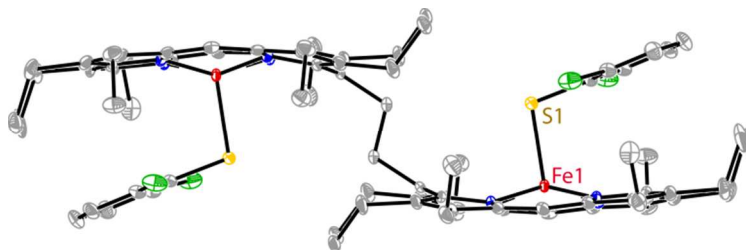

**Figure S3.** A perspective view of **2c** showing 50% thermal contours for all non-hydrogen atoms at 100 K (H atoms have been omitted for clarity).

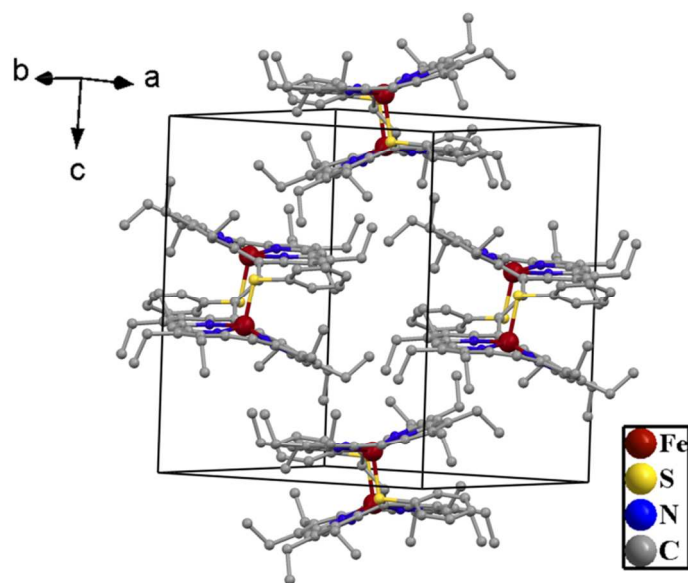

**Figure S4.** Diagram illustrating the packing of the **2a** in the unit cell (H-atoms and uncoordinated phenol have been omitted for clarity).

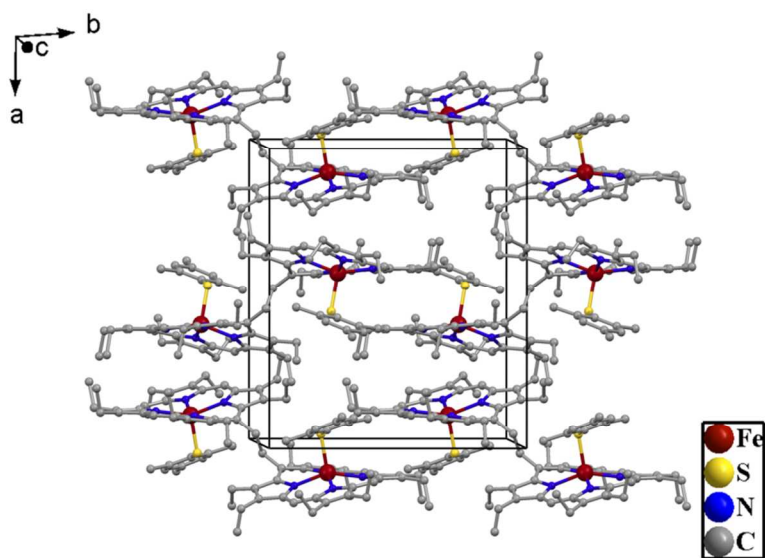

**Figure S5.** Diagram illustrating the packing of **2b** in the unit cell (H-atoms have been omitted for clarity).

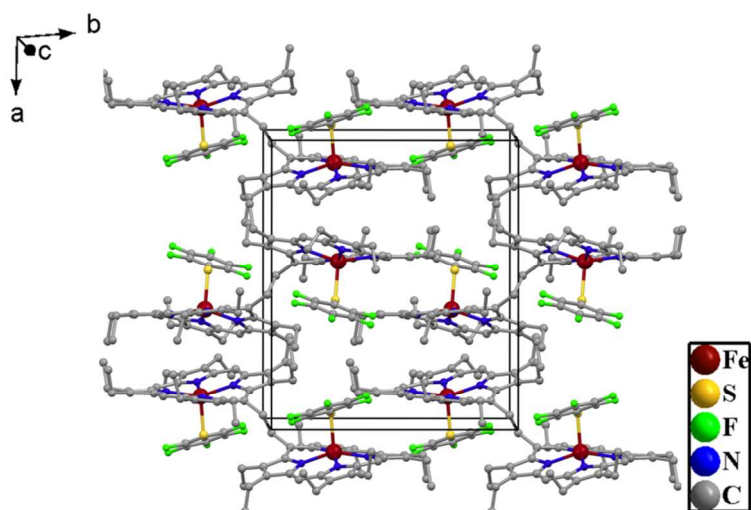

**Figure S6.** Diagram illustrating the packing of **2d** in the unit cell (H-atoms have been omitted for clarity).

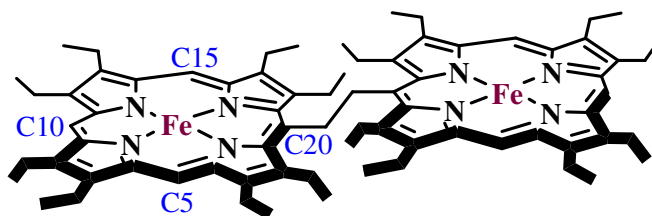

**Figure S7.** Atom numbering scheme used for the out-of-plane displacement plot of the porphyrin macrocycle.

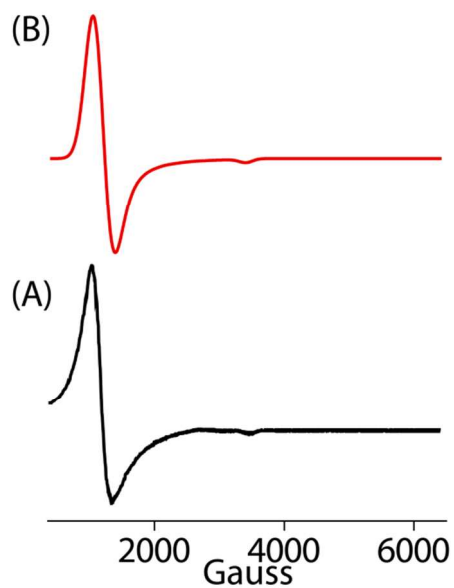

**Figure S8.** X-band EPR spectra of **2b** in  $\text{CH}_2\text{Cl}_2$  (at 120 K) (A) experimental and (B) simulated spectra.

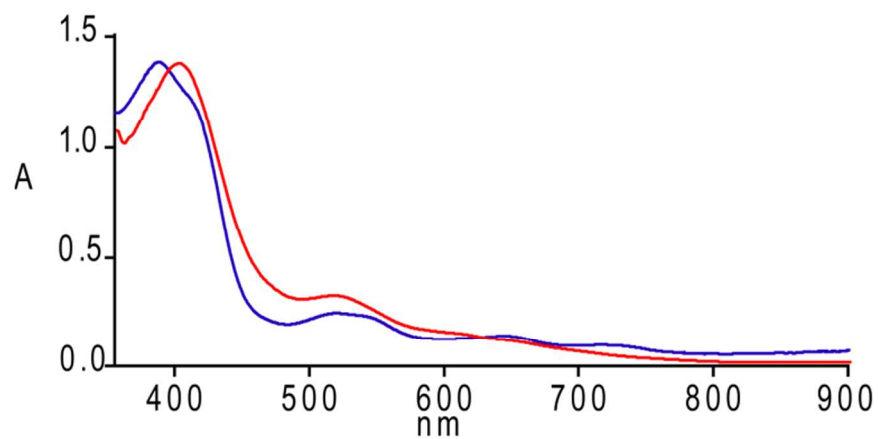

**Figure S9.** UV-visible spectra (at 298K) of **2a** (blue line) and **6a** (red line) in dichloromethane.

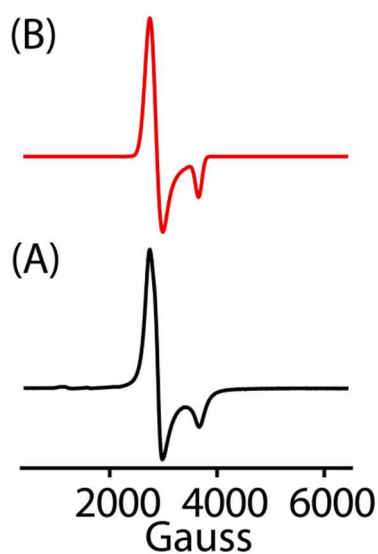

**Figure S10.** X-band EPR spectra of **6b** in  $\text{CH}_2\text{Cl}_2$  (at 120 K) (A) experimental and (B) simulated spectra.

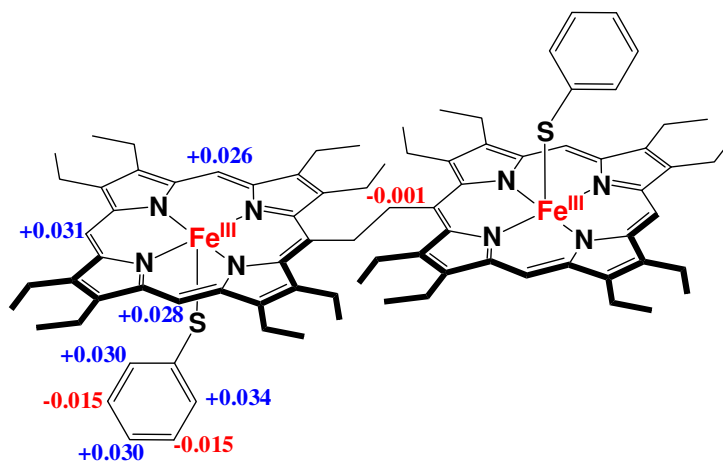

**Figure S11.** Mulliken spin densities on thiophenolato carbons and porphyrin *meso*- and bridging carbons for **2a**.

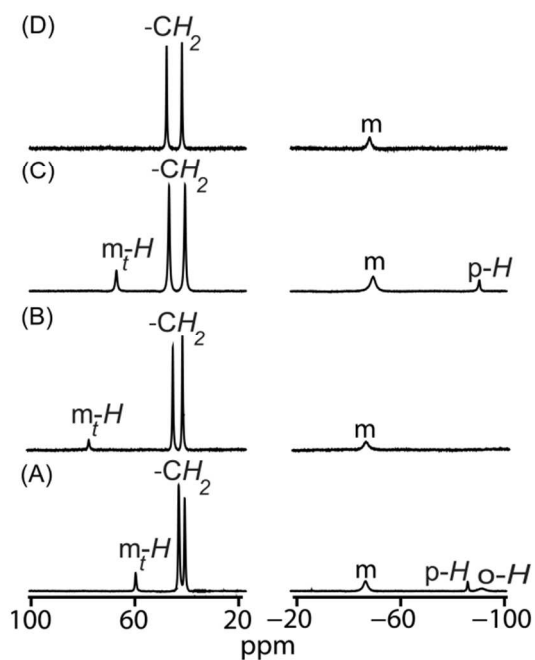

**Figure S12.**  $^1\text{H}$  NMR spectra (at 298 K in  $\text{CDCl}_3$ ) of (A) **4a**, (B) **4b**, (C) **4c** and (D) **4d**.

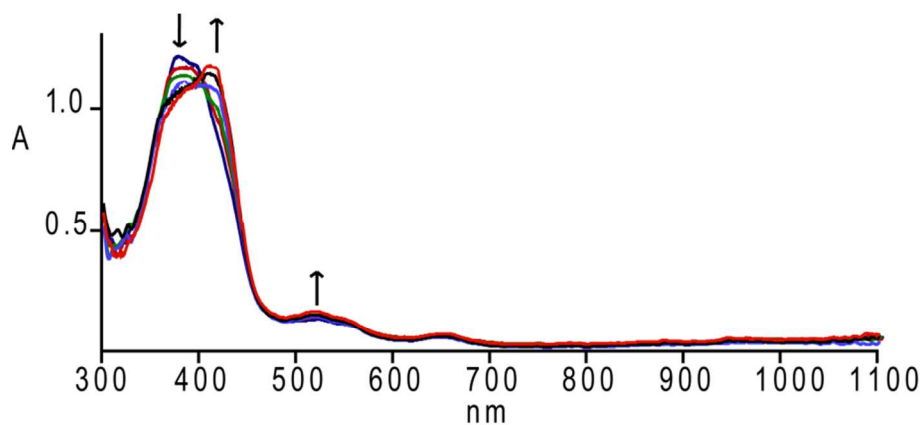

**Figure S13.** UV-visible spectral change in  $\text{CH}_2\text{Cl}_2$  during  $1e$ -reduction of **2c** at a constant potential of  $-0.75$  V under nitrogen at 298 K. Arrows indicate an increase or decrease of band intensity.
